# Supplementary material for: Church attendance, allostatic load and mortality in middle aged adults
Source: PLOS journal article supplement (doi:10.1371/journal.pone.0177618), 2017-05-16

**S1 Fig. Supplemental Figure 1.**

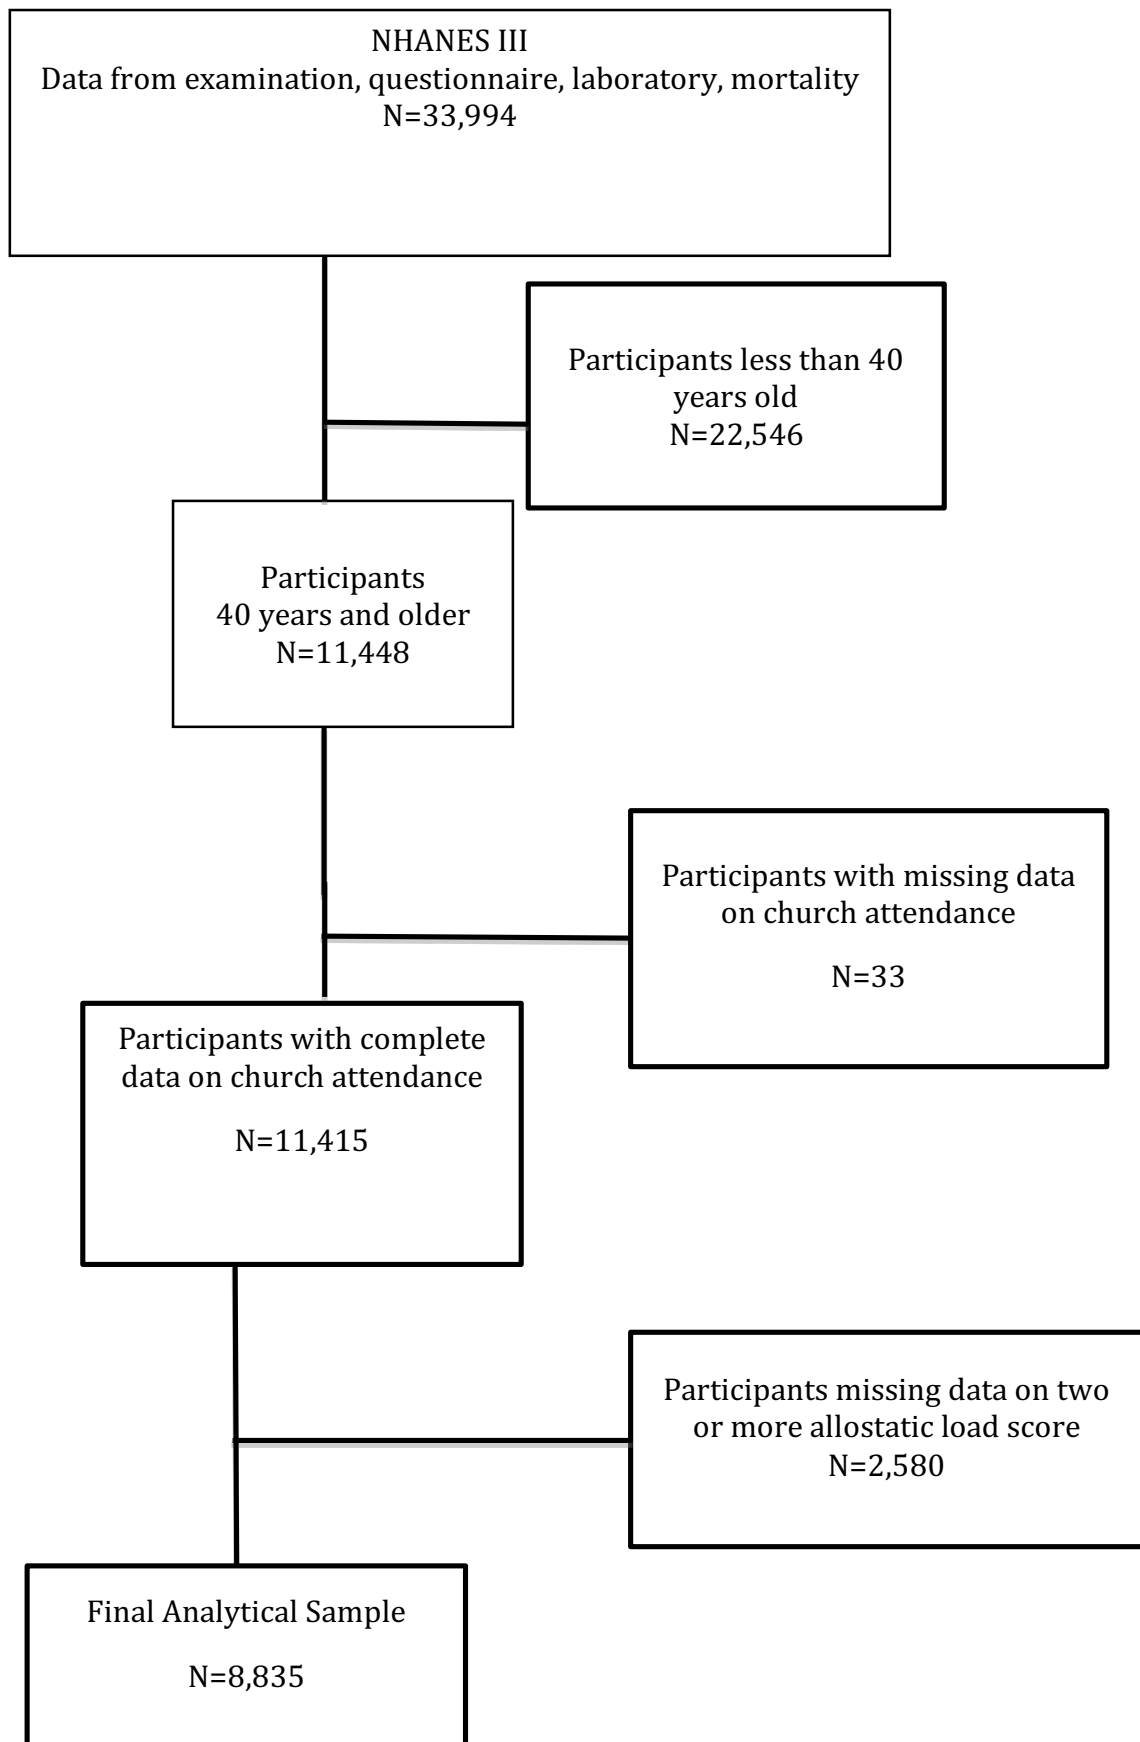

Supplement: S1 (10.1371/journal.pone.0177618.s001) [file journal.pone.0177618.s001]
